# Supplementary material for: HPV16 Intratypic Variants in Head and Neck Cancers: A North American Perspective
Source: MDPI journal article supplement (doi:10.3390/v15122411), 2023-12-12
Supplement: s1 [file s1]

**Table S2A.** Univariable and multivariable Cox proportional hazards regression for overall survival with HPV16+ A1 and A2 sublineages in the CANUSA cohort.

| Variable                           | Univariable Analysis   |              | Multivariable Analysis |              |
|------------------------------------|------------------------|--------------|------------------------|--------------|
|                                    | HR (95% CI)            | p value      | HR (95% CI)            | p value      |
| <b>Age at diagnosis</b>            | 1.02 (0.99 – 1.06)     | 0.200        |                        |              |
| <b>Sex:</b>                        |                        |              |                        |              |
| Male vs. Female                    | 0.38 (0.16 – 0.94)     | <b>0.036</b> | 0.49 (0.20 – 1.22)     | 0.126        |
| <b>Subsite:</b>                    |                        |              |                        |              |
| Tonsil vs. base-of-tongue          | 0.74 (0.28 – 1.96)     | 0.540        |                        |              |
| Other vs. base-of-tongue           | 1.32 (0.37 – 4.68)     | 0.669        |                        |              |
| <b>T stage:</b>                    |                        |              |                        |              |
| T3 – T4 vs. T1 – T2                | 3.28 (1.34 – 8.05)     | <b>0.009</b> | 2.82 (1.13 – 7.01)     | <b>0.026</b> |
| <b>N stage:</b>                    |                        |              |                        |              |
| N2 – N3 vs. N0 – N1                | 0.43 (0.19 – 0.99)     | <b>0.049</b> | 0.50 (0.22 – 1.17)     | 0.109        |
| <b>Overall Stage:</b>              |                        |              |                        |              |
| III – IV vs. I – II                | 0.99 (0.23 – 4.26)     | 0.991        |                        |              |
| <b>Smoking status:</b>             |                        |              |                        |              |
| Former vs. Never                   | 0.85 (0.27 – 2.68)     | 0.782        |                        |              |
| Current vs. Never                  | 1.18 (0.45 – 3.13)     | 0.732        |                        |              |
| <b>Smoking Frequency:</b>          |                        |              |                        |              |
| Light vs. Never                    | 0.68 (0.18 – 2.65)     | 0.583        |                        |              |
| Heavy vs. Never                    | 1.21 (0.47 – 3.07)     | 0.693        |                        |              |
| <b>HPV16 A Sublineages:</b>        |                        |              |                        |              |
| A2 vs A1                           | 1.70 (0.71 – 4.06)     | 0.231        |                        |              |
| <b>Treatment:</b>                  |                        |              |                        |              |
| Chemotherapy + Radiation           | 6.08e-01 (0.26 – 1.43) | 0.253        |                        |              |
| Surgery + Chemotherapy + Radiation | 1.39e-08 (0 – Inf)     | 0.998        |                        |              |
| Surgery + Radiation                | 1.43e-08 (0 – Inf)     | 0.999        |                        |              |
| Surgery Alone                      | 1.64 (0.70 – 3.85)     | 0.253        |                        |              |
| Radiation Alone                    | 1.43e-08 (0 – Inf)     | 0.998        |                        |              |

**Table S2B.** Univariable and multivariable Cox proportional hazards regression for disease-free survival with HPV16+ A1 and A2 sublineages in the CANUSA cohort.

| Variable                  | Univariable Analysis |              | Multivariable Analysis |              |
|---------------------------|----------------------|--------------|------------------------|--------------|
|                           | HR (95% CI)          | p value      | HR (95% CI)            | p value      |
| <b>Age at diagnosis</b>   | 1.04 (1.00 – 1.08)   | <b>0.042</b> | 1.03 (0.99 – 1.08)     | 0.068        |
| <b>Sex:</b>               |                      |              |                        |              |
| Male vs. Female           | 0.45 (0.18 – 1.15)   | 0.095        | 2.99 (0.11 – 0.84)     | <b>0.021</b> |
| <b>Subsite:</b>           |                      |              |                        |              |
| Tonsil vs. base-of-tongue | 0.60 (0.23 – 1.55)   | 0.292        |                        |              |
| Other vs. base-of-tongue  | 1.18 (0.34 – 4.02)   | 0.798        |                        |              |
| <b>T stage:</b>           |                      |              |                        |              |
| T3 – T4 vs. T1 – T2       | 3.34 (1.36 – 8.21)   | <b>0.008</b> | 2.34 (0.91 – 6.03)     | 0.077        |
| <b>N stage:</b>           |                      |              |                        |              |
| N2 – N3 vs. N0 – N1       | 0.76 (0.31 – 1.81)   | 0.536        |                        |              |
| <b>Overall Stage:</b>     |                      |              |                        |              |
| III – IV vs. I – II       | 2.05 (0.27 – 15.35)  | 0.483        |                        |              |
| <b>Smoking status:</b>    |                      |              |                        |              |
| Former vs. Never          | 1.24 (0.43 – 3.56)   | 0.687        |                        |              |

|                                       |                        |              |                        |              |
|---------------------------------------|------------------------|--------------|------------------------|--------------|
| Current vs. Never                     | 0.98 (0.35 – 2.70)     | 0.965        |                        |              |
| <b>Smoking Frequency:</b>             |                        |              |                        |              |
| Light vs. Never                       | 0.72 (0.19 – 2.78)     | 0.630        |                        |              |
| Heavy vs. Never                       | 1.24 (0.49 – 3.16)     | 0.646        |                        |              |
| <b>HPV16 A Sublineages:</b>           |                        |              |                        |              |
| A2 vs A1                              | 2.52 (0.99 – 6.44)     | 0.054        | 2.00 (0.76 – 5.26)     | 0.158        |
| <b>Treatment:</b>                     |                        |              |                        |              |
| Chemotherapy + Radiation              | 3.75e-01 (0.16 – 0.90) | <b>0.029</b> | 3.99e-01 (0.17 – 0.96) | <b>0.041</b> |
| Surgery + Chemotherapy +<br>Radiation | 1.51e-08 (0 – Inf)     | 0.998        |                        |              |
| Surgery + Radiation                   | 1.59e-08 (0 – Inf)     | 0.999        |                        |              |
| Surgery Alone                         | 2.67 (1.11 – 6.42)     | <b>0.029</b> |                        |              |
| Radiation Alone                       | 1.59e-08 (0 – Inf)     | 0.998        |                        |              |
